# Supplementary material
Source: PubMed Central journal article supplement (PMC3220604)
Supplement: NIHMS335421-supplement-01.pdf [file NIHMS335421-supplement-01.pdf]

**Supplementary Table S1**

## Control Serine Residues with High Asp/Glu Replacement Percentages

| Protein name                                                 | Species | Ser residue | # of homologs | # with a residue other than Ser at this site | Asp + Glu % |
|--------------------------------------------------------------|---------|-------------|---------------|----------------------------------------------|-------------|
| TUBA6                                                        | Human   | 292         | 208           | 207                                          | 100.0       |
| EF2                                                          | Human   | 530         | 252           | 225                                          | 98.2        |
| EF2                                                          | Human   | 677         | 316           | 215                                          | 98.1        |
| Thyroid hormone receptor alpha (c-ErbA)                      | Chicken | 381         | 75            | 52                                           | 96.2        |
| Isoform 1 OF myosin-5A                                       | Human   | 1118        | 85            | 75                                           | 96.0        |
| Isoform 1 OF Krueppel-like factor 3                          | Human   | 275         | 72            | 22                                           | 95.5        |
| 14-3-3 protein beta/alpha                                    | Cow     | 144         | 93            | 87                                           | 94.3        |
| Multidrug resistance-associated protein 4                    | Human   | 906         | 77            | 69                                           | 94.2        |
| Isoform 1 of cytoplasmic linker protein 2                    | Human   | 194         | 84            | 69                                           | 94.2        |
| ISOFORM 1 OF MYOSIN-5A                                       | Human   | 1712        | 85            | 69                                           | 94.2        |
| Zinc finger protein 516                                      | Human   | 273         | 155           | 152                                          | 94.1        |
| EF2                                                          | Human   | 540         | 316           | 76                                           | 93.4        |
| Phosphoribosyl pyrophosphate synthetase-associated protein 2 | Human   | 189         | 134           | 128                                          | 93.0        |
| TUBA6                                                        | Human   | 312         | 208           | 200                                          | 92.5        |
| Isoform 1 of cytoplasmic linker protein 2                    | Human   | 551         | 84            | 78                                           | 92.3        |
| Isoform 1 of myosin-5A                                       | Human   | 347         | 85            | 77                                           | 92.2        |
| Isoform 1 of myosin-5A                                       | Human   | 1673        | 85            | 73                                           | 91.8        |
| Isoform 1 of myosin-5A                                       | Human   | 1127        | 85            | 72                                           | 91.7        |
| Isoform 1 of myosin-5A                                       | Human   | 1714        | 85            | 70                                           | 91.4        |
| Isoform 1 of cytoplasmic linker protein 2                    | Human   | 854         | 84            | 79                                           | 91.1        |
| Isoform 1 of cytoplasmic linker protein 2                    | Human   | 899         | 84            | 79                                           | 91.1        |
| Tubulin beta-2C chain                                        | Human   | 153         | 359           | 172                                          | 89.5        |
| Tubulin beta-2C chain                                        | Human   | 413         | 359           | 163                                          | 89.0        |
| RAB31                                                        | Human   | 42          | 354           | 272                                          | 87.5        |
| MAP kinase kinase 1                                          | Rabbit  | 149         | 421           | 305                                          | 84.6        |
| EF2                                                          | Human   | 773         | 316           | 248                                          | 79.4        |





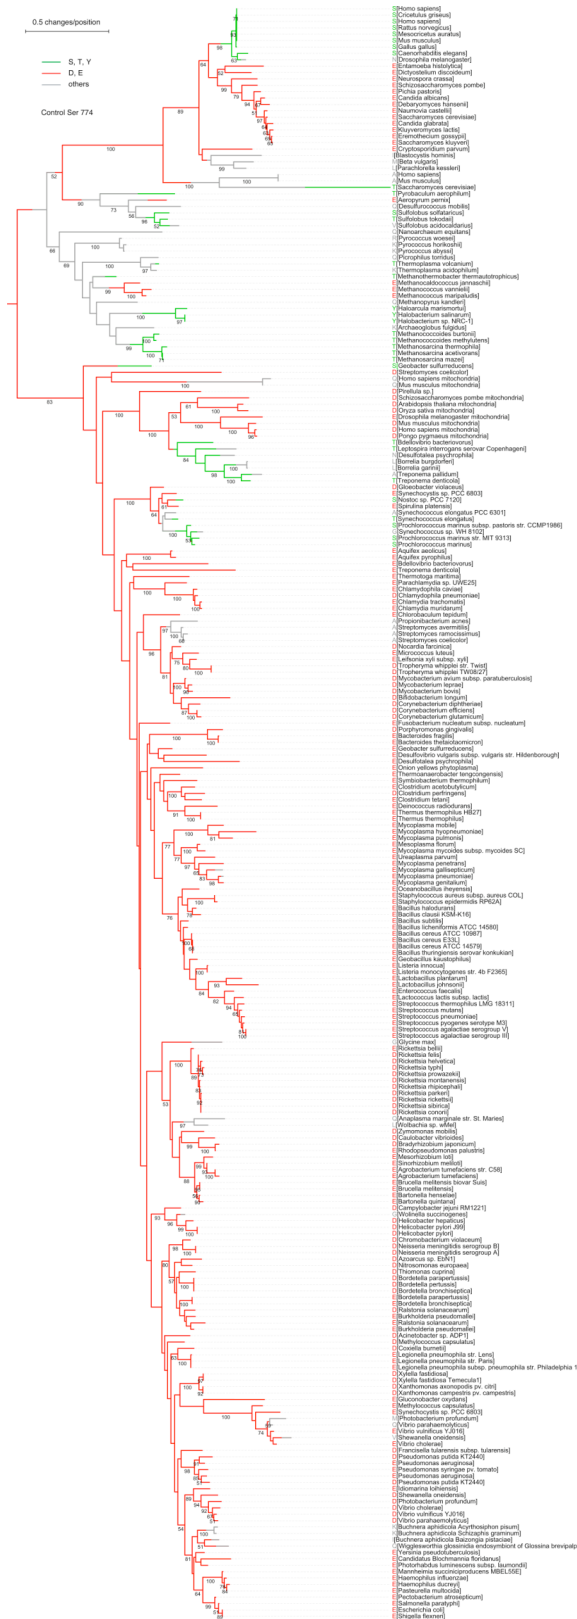

**Table S2C. Detailed Phylogenetic Tree for Control Serine 774 in eEF2 [related to Figure 4]**

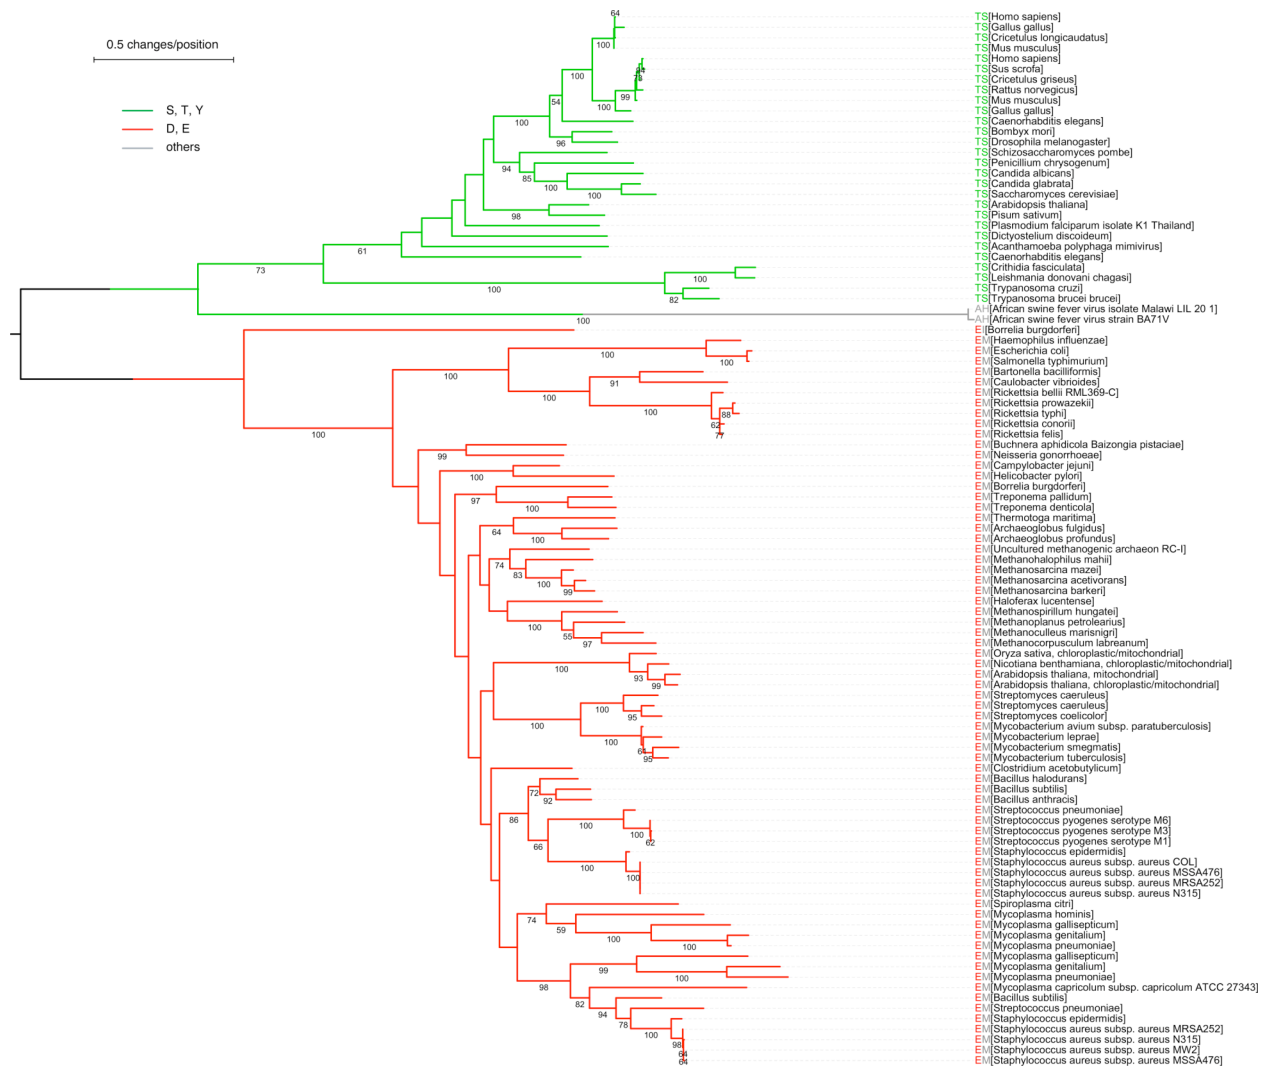

**Table S2D. Detailed Phylogenetic Tree for DNA Topoisomerase II [related to Figure 4]**

This tree adds the species names, the identities of the residues corresponding to T639, and the bootstrap values (when >50%) to the tree shown in Figure 4B.

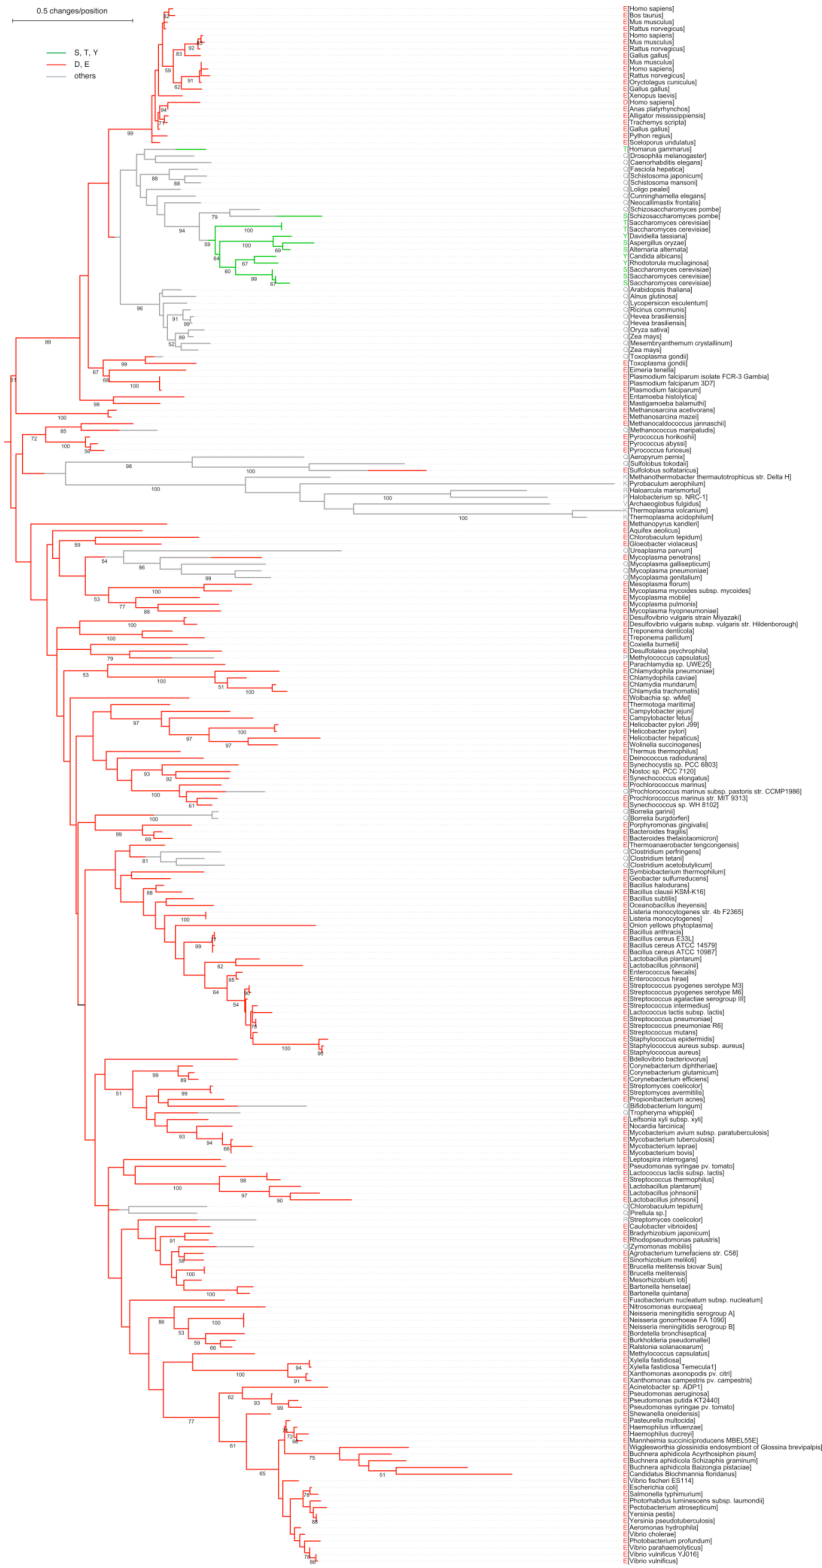

**Table S3A. Detailed Phylogenetic Tree for Enolase [related to Figure 5]**

This tree adds the species names, the identities of the residues corresponding to S10, and the bootstrap values (when >50%) to the tree shown in Figure 5A.

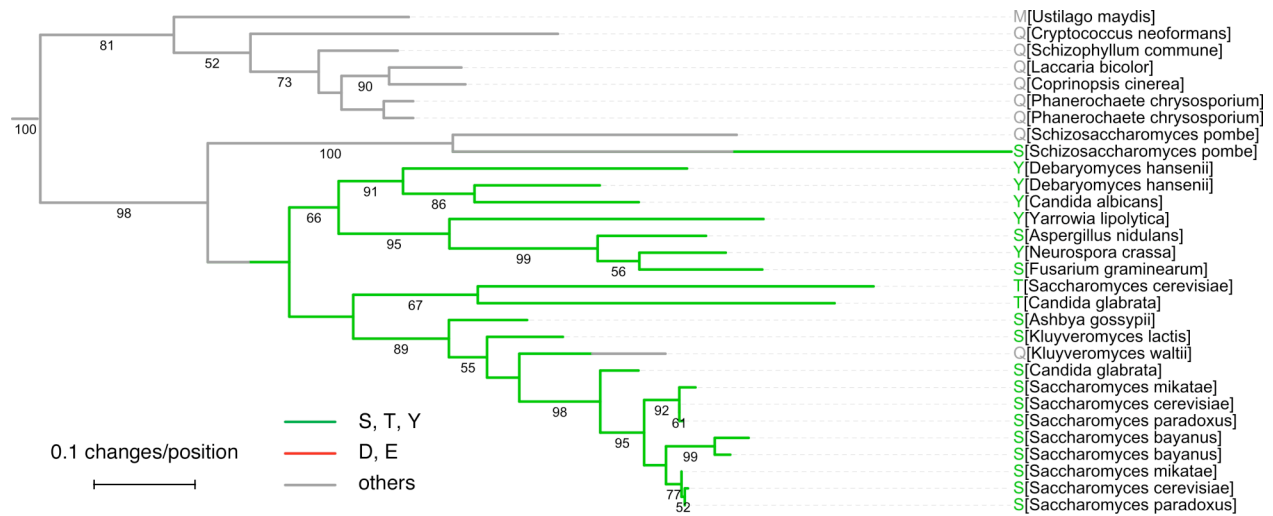

**Table S3B. Detailed Phylogenetic Tree for the Fungal Enolases [related to Figure 5]**

This tree adds the species names, the identities of the residues corresponding to S10, and the bootstrap values (when >50%) to the tree shown in Figure 5B.







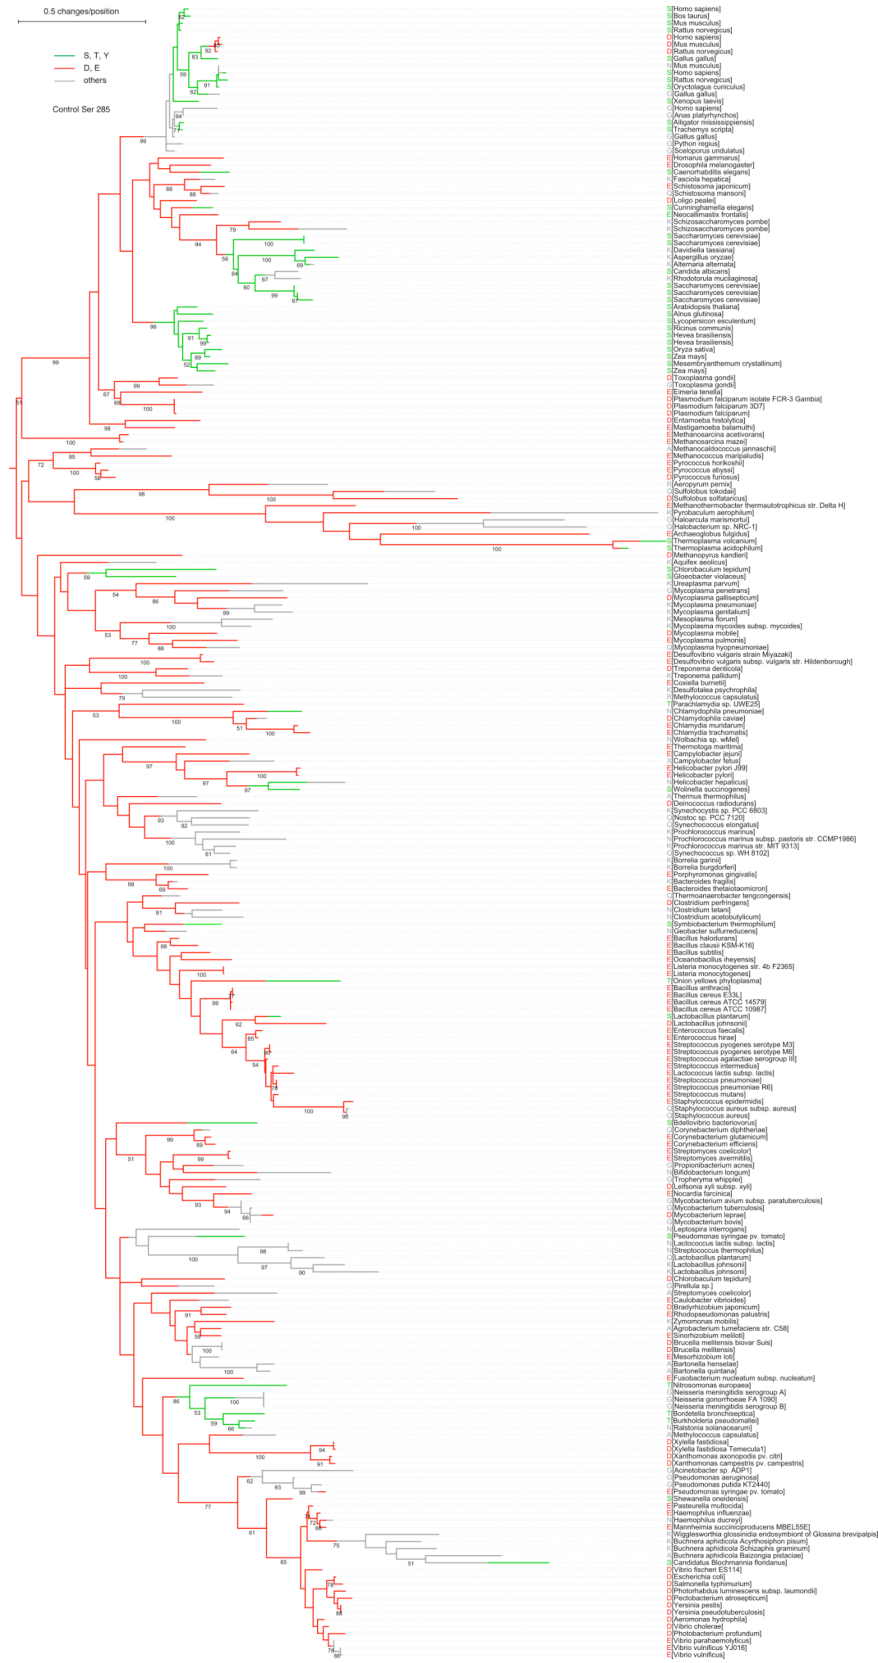

**Table S3E. Detailed Phylogenetic Tree for Control Serine 285 in Enolase [related to Figure 5]**

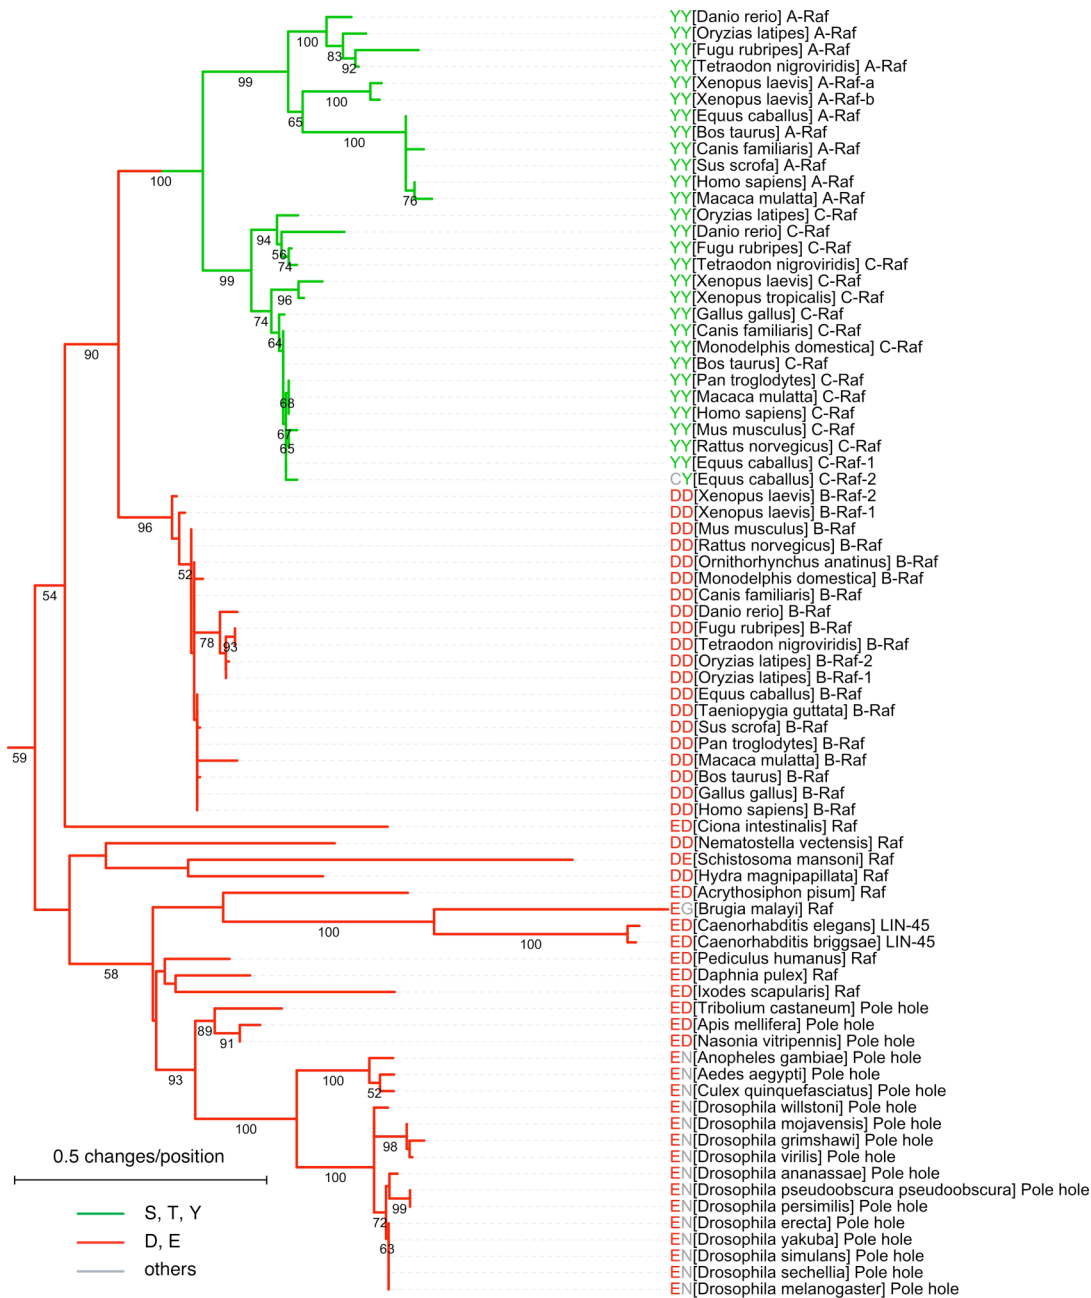

**Table S4A. Detailed Phylogenetic Tree for Raf**  
[related to Figure 6]

This tree adds the species names, the identities of the residues corresponding to Y340 and Y341, and the bootstrap values (when >50%) to the tree shown in Figure 6A.

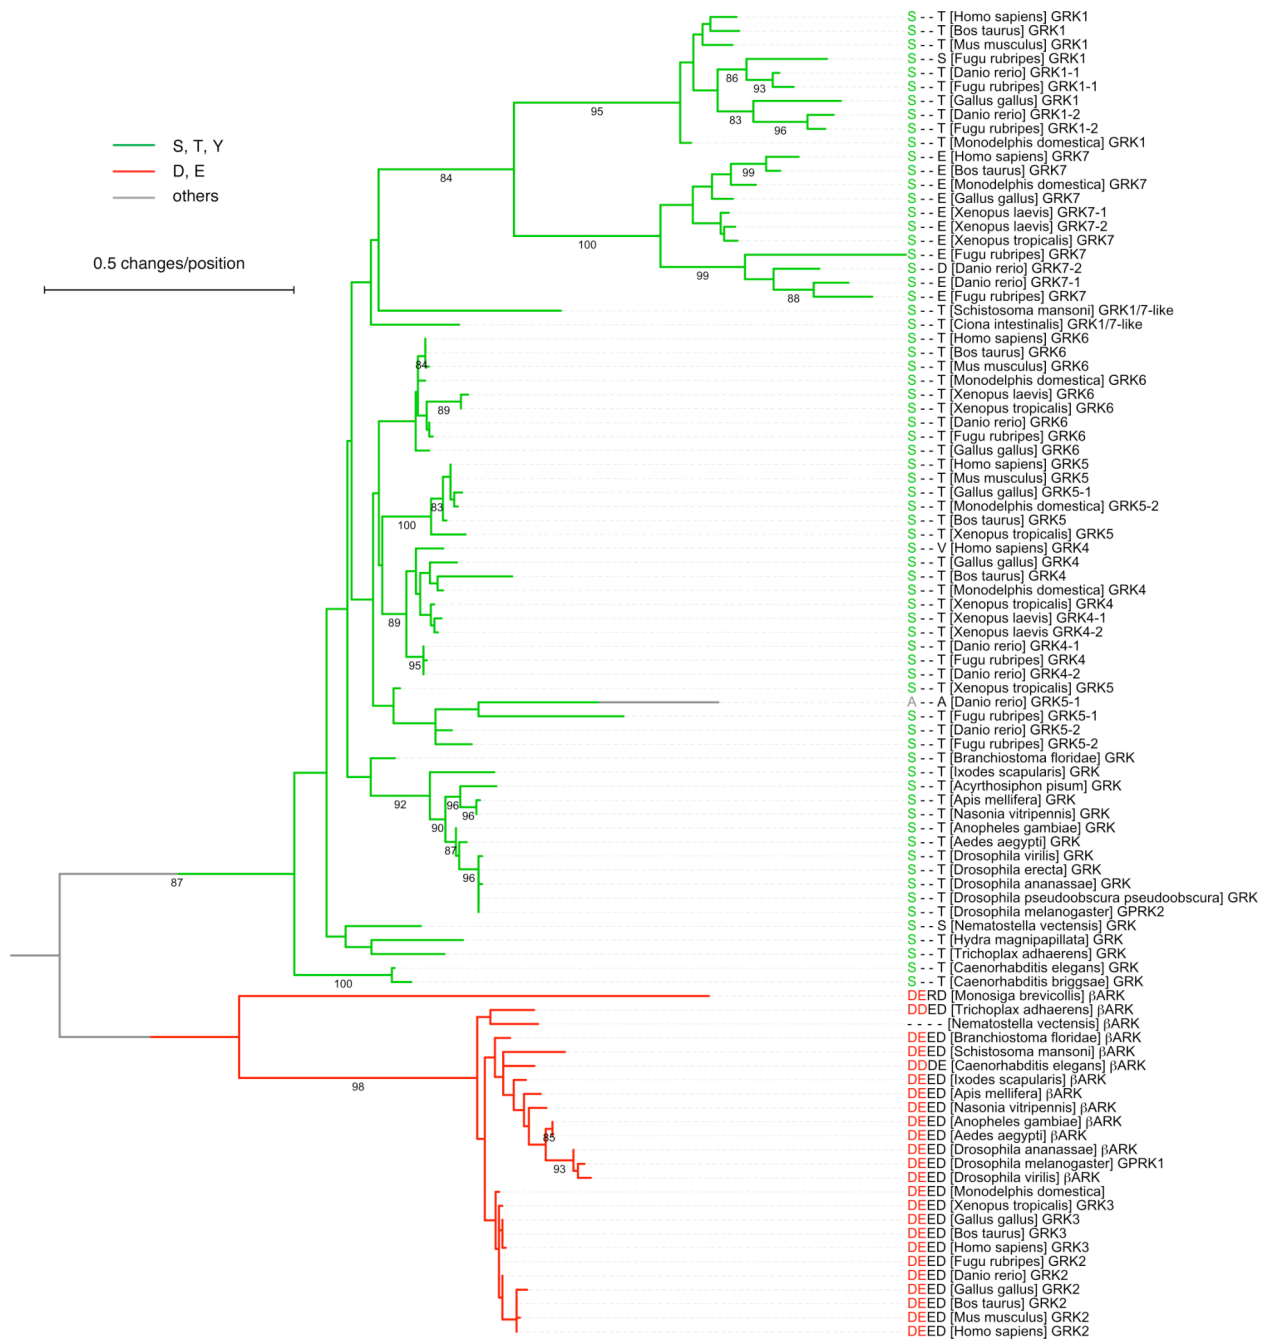

**Table S4B. Detailed Phylogenetic Tree for S484 of GRK5 [related to Figure 6]**

This tree adds the species names, the identities of the residues corresponding to S484 and T485, and the bootstrap values (when >50%) to the tree shown on the left in Figure 6C. Leaves, branches and internal nodes are colored according to the residue corresponding to S484.

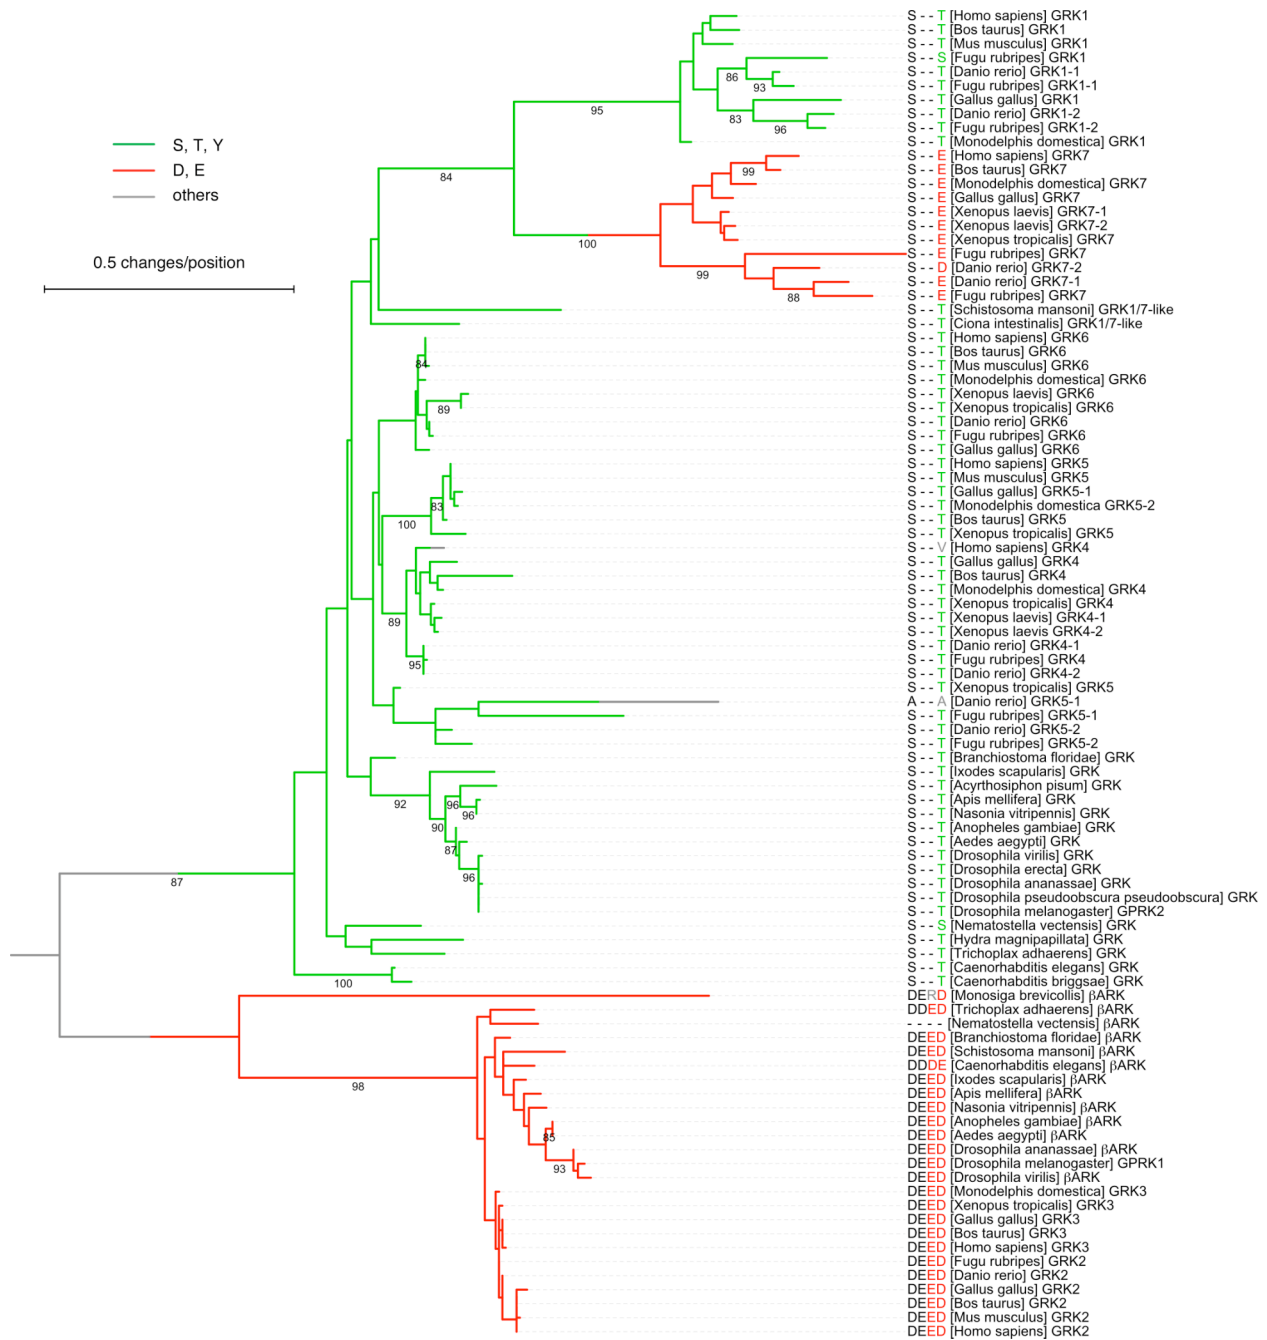

**Table S4C. Detailed Phylogenetic Tree for T485 of GRK5 [related to Figure 6]**

This tree adds the species names, the identities of the residues corresponding to S484 and T485, and the bootstrap values (when >50%) to the tree shown on the right in Figure 6C. Leaves, branches and internal nodes are colored according to the residue corresponding to T485.

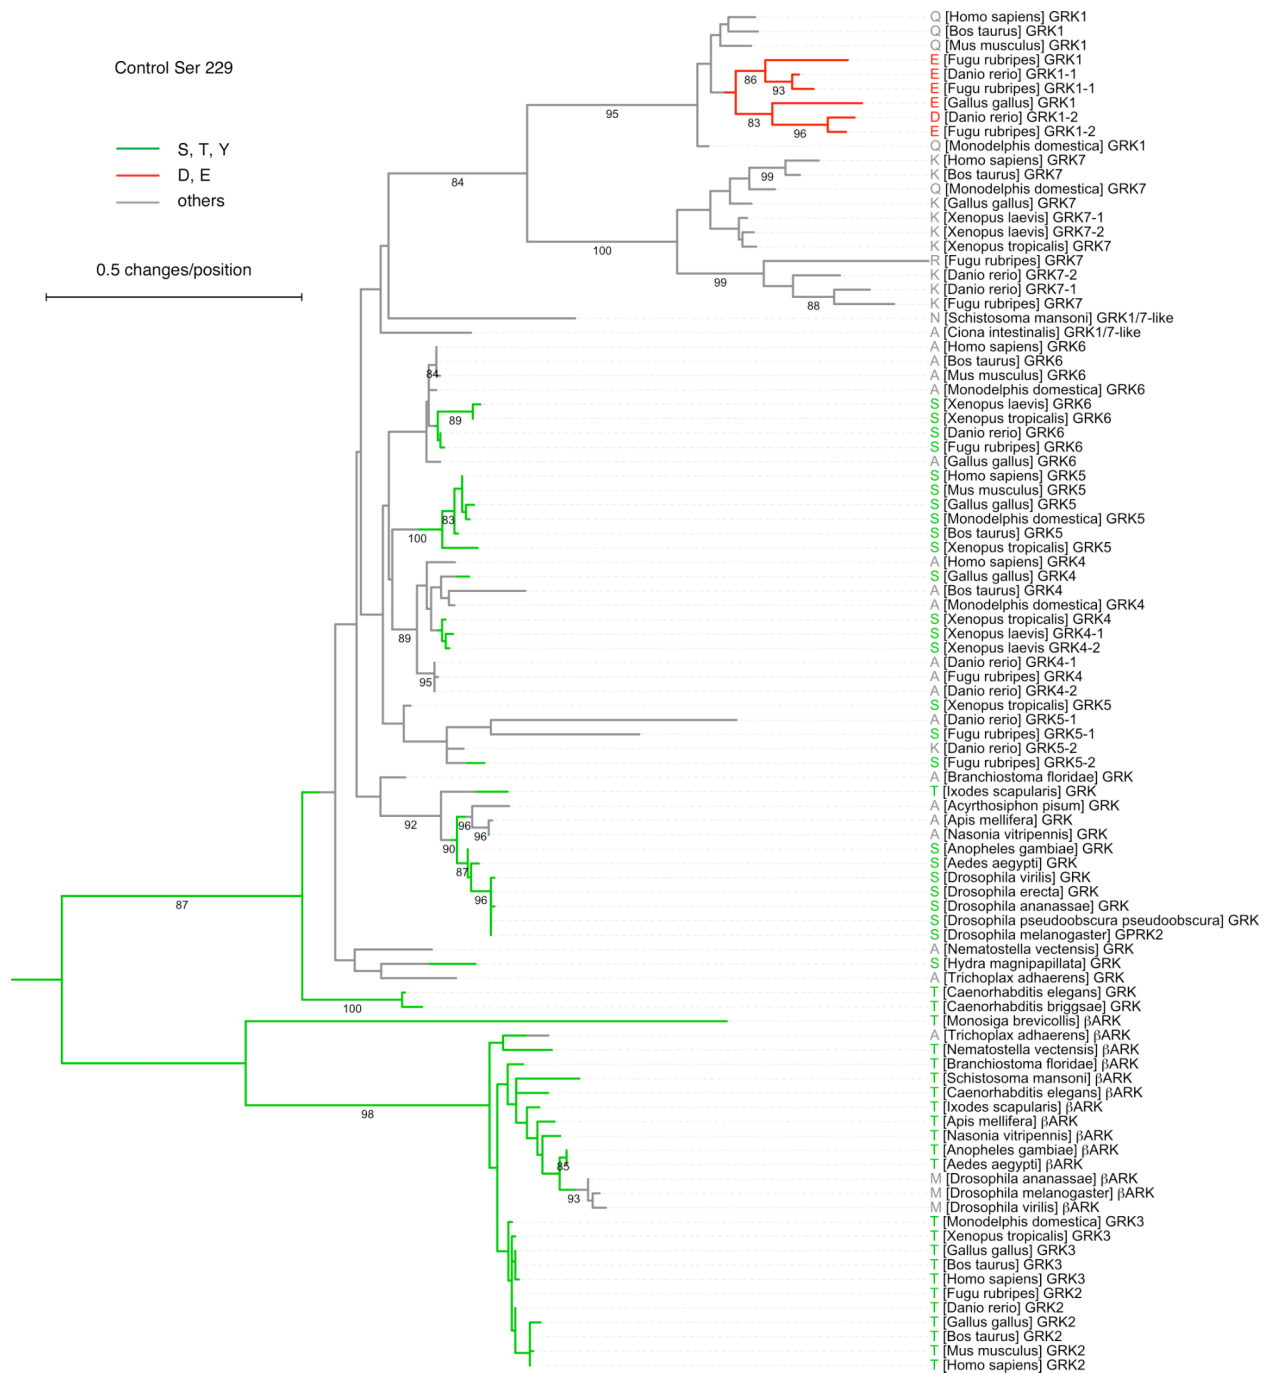

**Table S4D. Detailed Phylogenetic Tree for Control Serine 229 in GRK5 [related to Figure 6]**

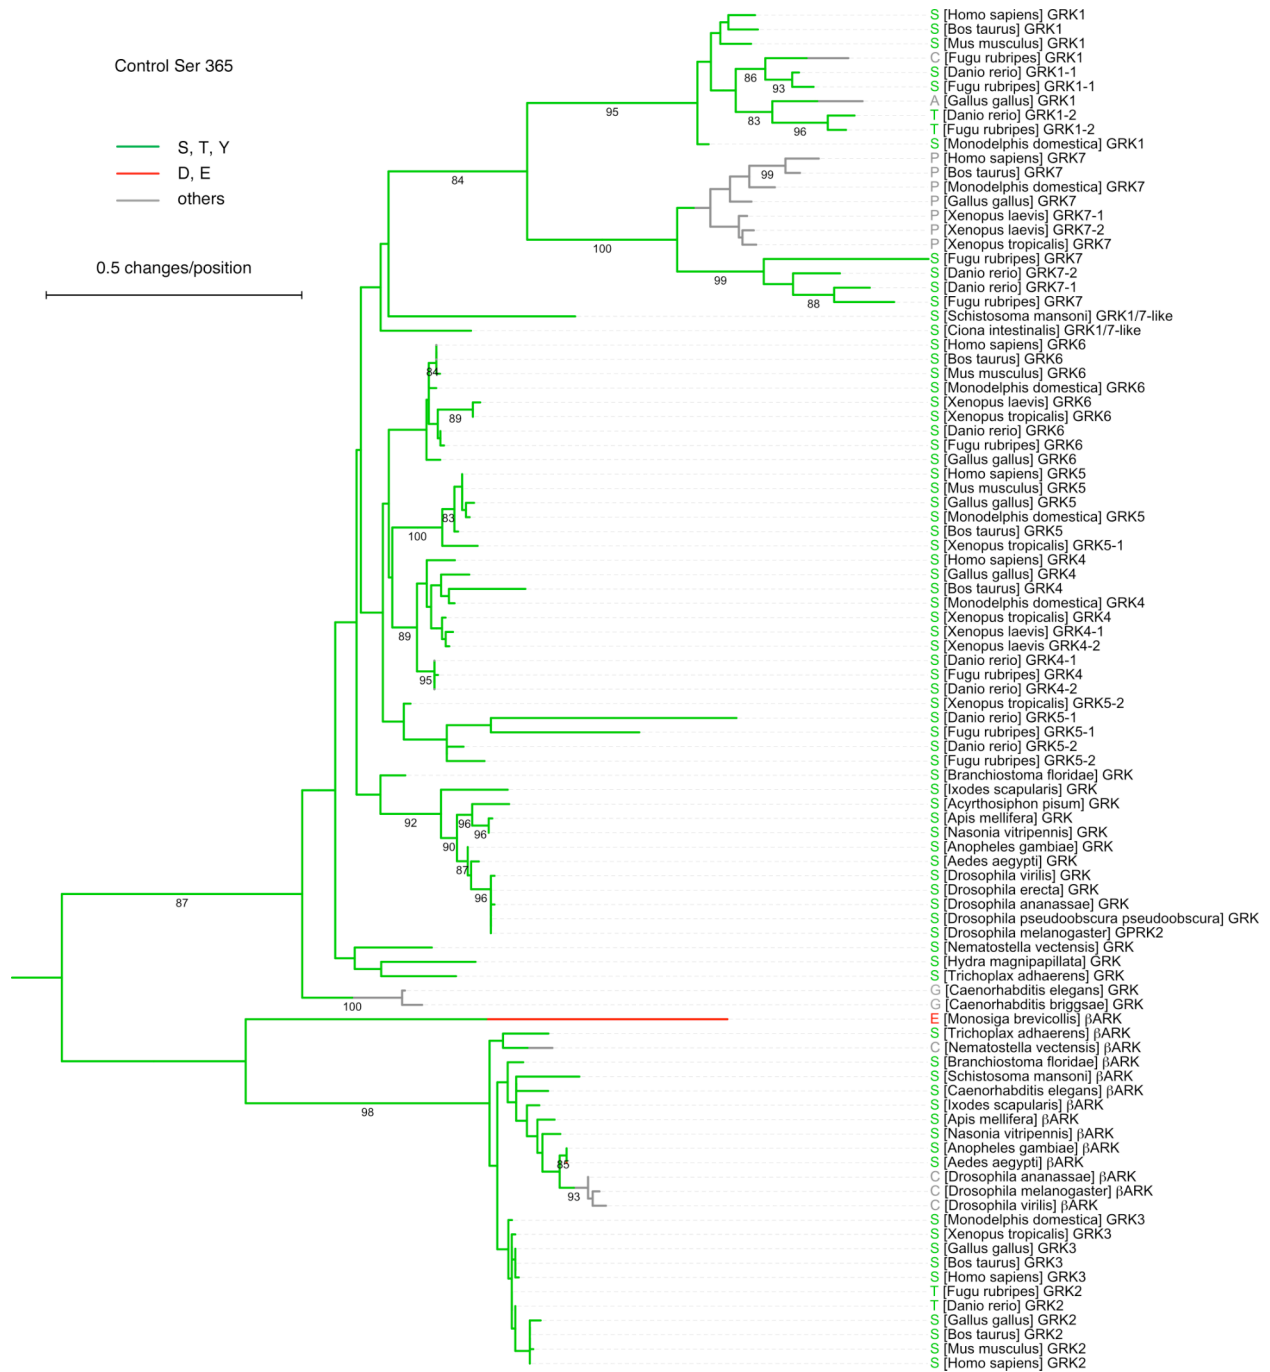

**Table S4E. Detailed Phylogenetic Tree for Control Serine 365 in GRK5 [related to Figure 6]**

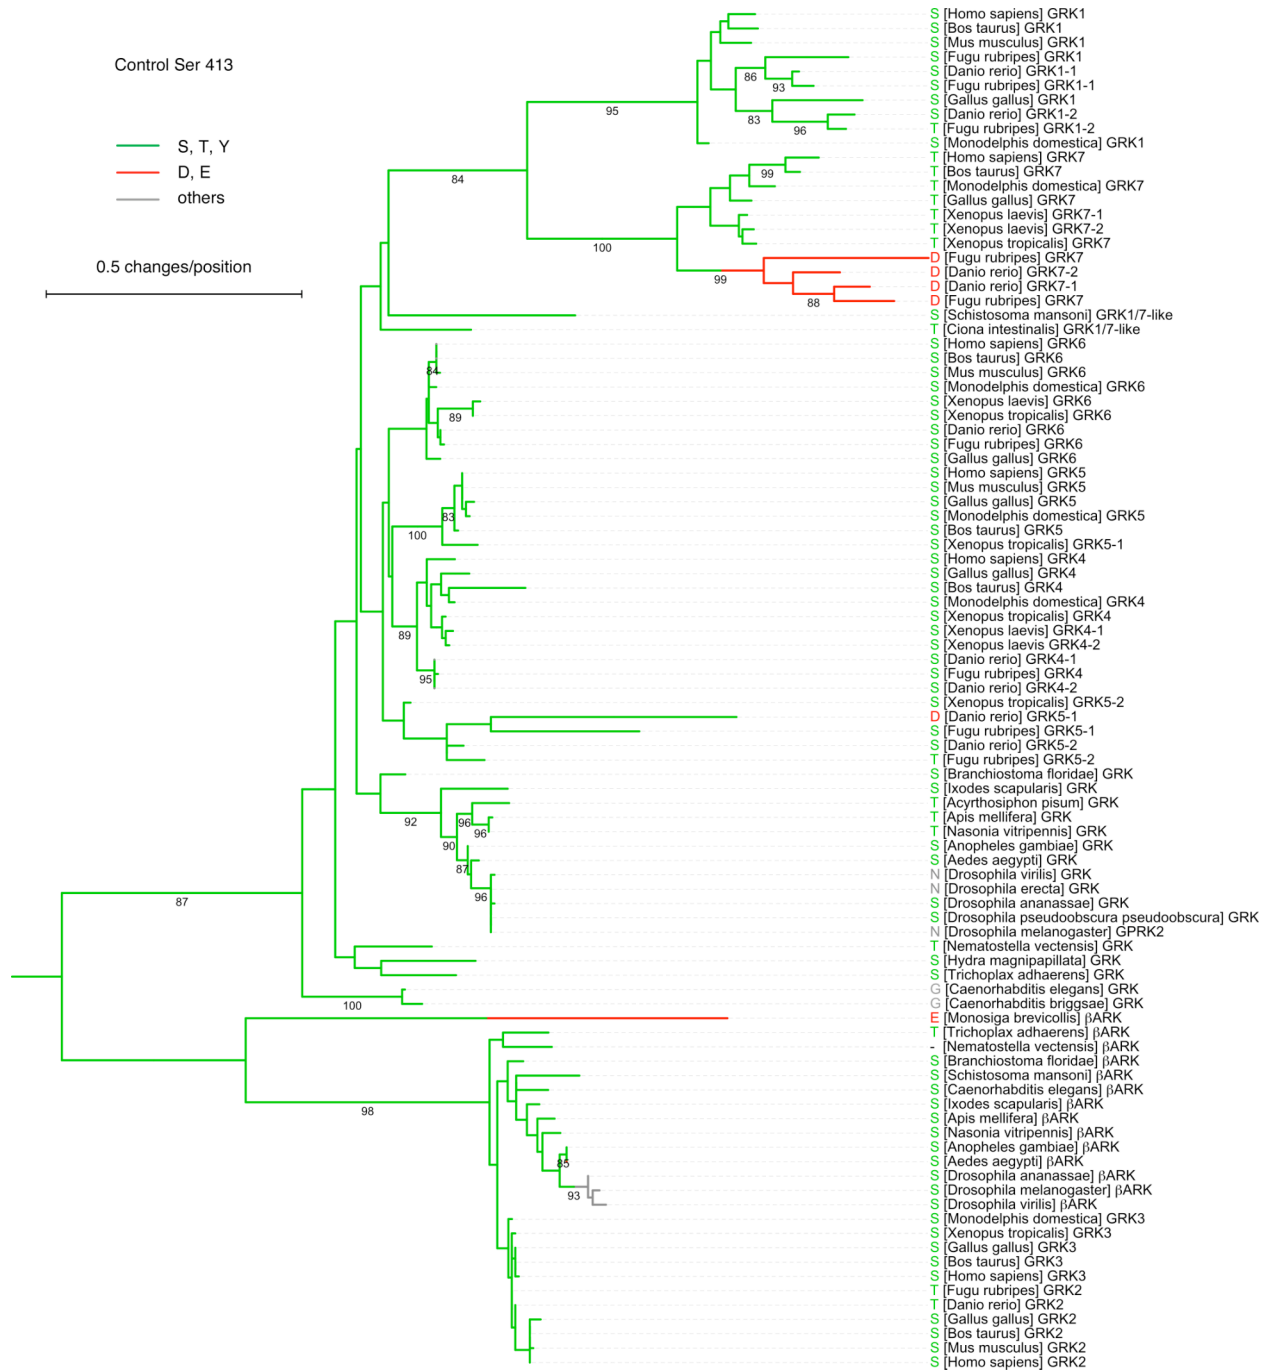

**Table S4F. Detailed Phylogenetic Tree for Control Serine 413 in GRK5**



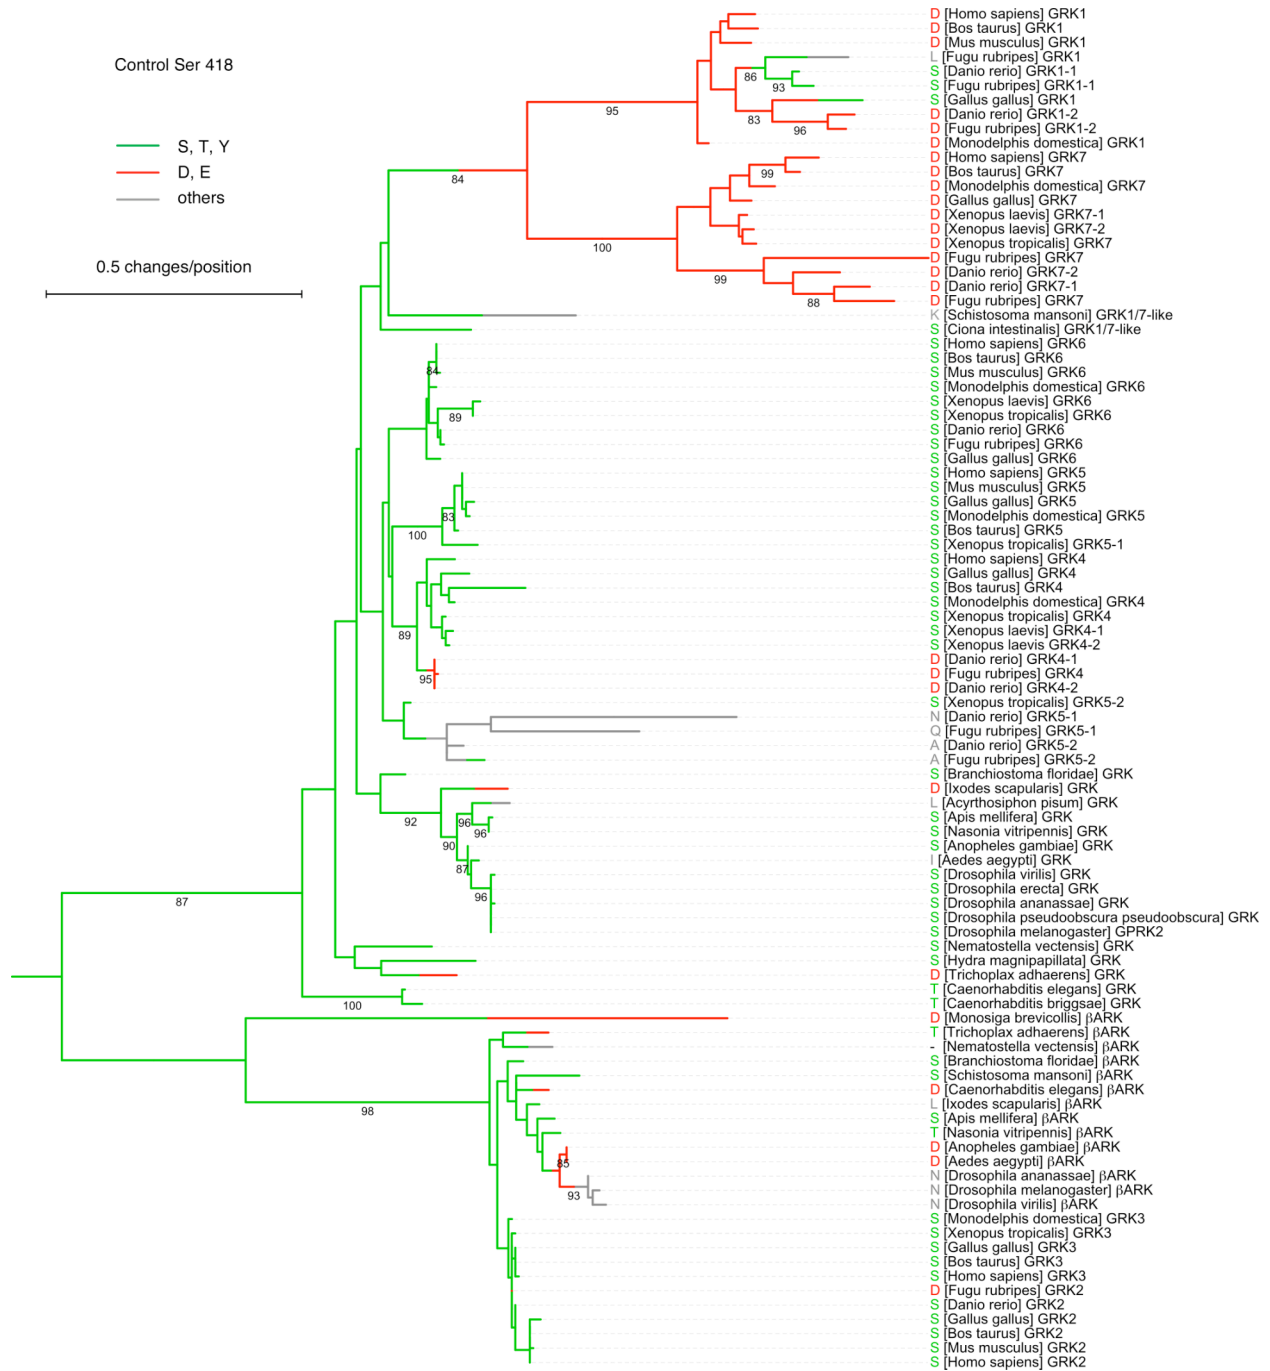

**Table S4G. Detailed Phylogenetic Tree for Control Serine 418 in GRK5**

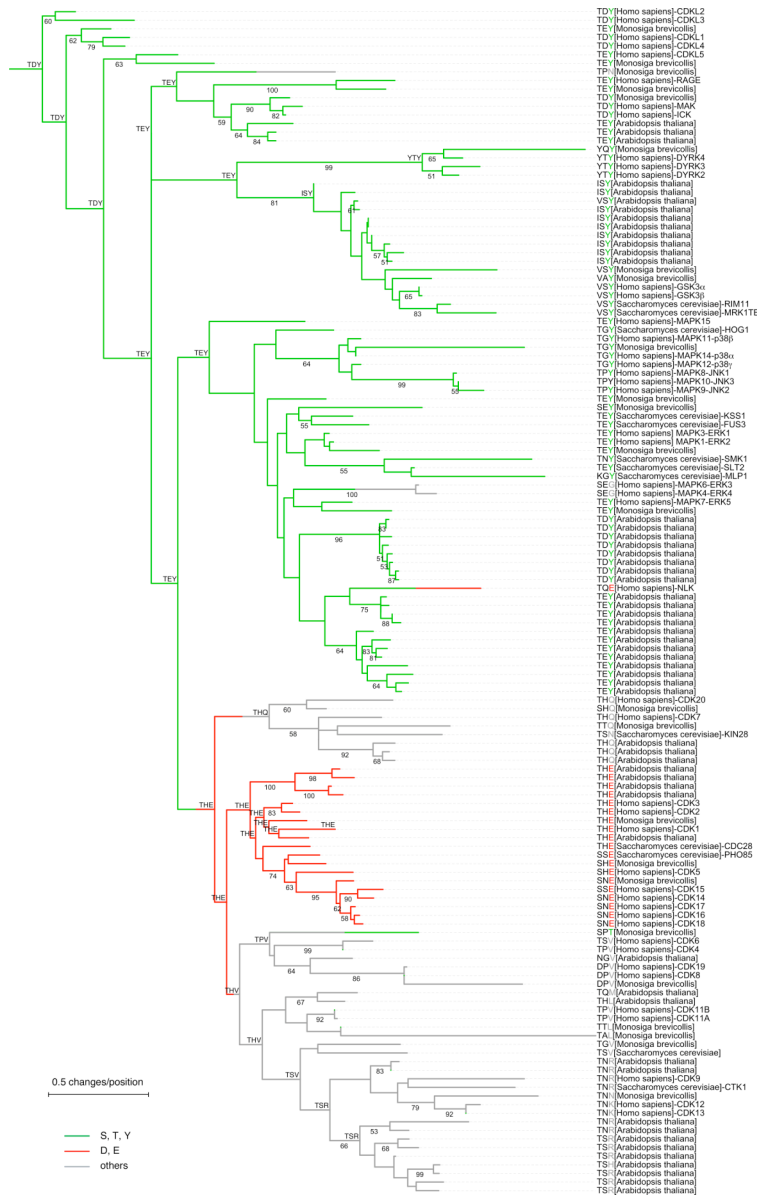

**Table S4H. Detailed Phylogenetic Tree for the CMGC Family of Protein Kinases**

Because a full species tree for the CMGC family of kinases would be too large to display, we have restricted the tree shown here to CMGC kinases from four species: *Homo sapiens*, *Saccharomyces cerevisiae*, *Arabidopsis thaliana*, and *Monosiga brevicollis*. The tree is labeled with the species names, the identities of the residues corresponding to the TEY motif in ERK2, and the bootstrap values (when >50%). Some of the internal nodes are labeled with the inferred sequence of the hypothetical ancestral proteins to trace the evolution of the primordial TDY motif to the sequences present in the present-day ERK2 and CDK1 proteins.

Note that in GSK3 and some of its close relatives, the tyrosine phosphosite is hypothesized to be autophosphorylated co-translationally and then to act as a structural phosphate, resistant to dephosphorylation (Cole et al., 2004). Thus, it is possible that a primordial pY that acted as a permanent negative charge (persisting today in GSK3) evolved into both the Glu-containing kinases like CDK1, which have a different permanent negative charge in this position, and the kinases like ERK2, where the tyrosine phosphate turns over and acts as a conditional negative charge.

### **Supplemental Reference**

Cole, A., Frame, S., and Cohen, P. (2004). Further evidence that the tyrosine phosphorylation of glycogen synthase kinase-3 (GSK3) in mammalian cells is an autophosphorylation event. *Biochem J* 377, 249-255.
